# Supplementary material
Source: PubMed Central journal article supplement (PMC8286974)
Supplement: NIHMS1664518-supplement-1.pdf [file NIHMS1664518-supplement-1.pdf]

Supplementary Table S1

*Sample-Level Moderators of the Meta-Analytic Associations for Verbal Reasoning*

|                               | With CogUSA Analogies             |              |          |          | With CogUSA Similarities          |             |          |          |
|-------------------------------|-----------------------------------|--------------|----------|----------|-----------------------------------|-------------|----------|----------|
|                               | Difference<br>in Partial <i>r</i> | 95% CI       | <i>Q</i> | <i>p</i> | Difference<br>in Partial <i>r</i> | 95% CI      | <i>Q</i> | <i>p</i> |
| <b>Neuroticism</b>            |                                   |              |          |          |                                   |             |          |          |
| Age 60                        | .063                              | .009, .116   | 5.19     | .023     | .076                              | .031, .120  | 10.80    | .001     |
| Personality Measure (BFI)     | -.063                             | -.123, -.003 | 4.21     | .040     | -.048                             | -.118, .022 | 1.83     | .176     |
| Personality Measure (MIDI)    | .043                              | -.051, .136  | .81      | .369     | .029                              | -.071, .129 | .33      | .568     |
| Verbal Measure (Analogies)    | .042                              | -.025, .108  | 1.51     | .219     | .043                              | -.031, .116 | 1.29     | .257     |
| Verbal Measure (Similarities) | -.022                             | -.101, .057  | .30      | .582     | -.027                             | -.100, .045 | .55      | .460     |
| Prospective measure (UAS)     | .090                              | .033, .146   | 9.70     | .002     | .099                              | .048, .150  | 14.38    | .000     |
| <b>Extraversion</b>           |                                   |              |          |          |                                   |             |          |          |
| Age 60                        | -.027                             | -.057, .003  | 3.05     | .081     | -.037                             | -.080, .005 | 2.95     | .086     |
| Personality Measure (BFI)     | .029                              | -.011, .068  | 1.97     | .161     | .023                              | -.031, .077 | .69      | .406     |
| Personality Measure (MIDI)    | .004                              | -.050, .058  | .02      | .882     | .014                              | -.057, .085 | .15      | .702     |
| Verbal Measure (Analogies)    | -.018                             | -.057, .020  | .89      | .346     | -.029                             | -.079, .022 | 1.25     | .264     |
| Verbal Measure (Similarities) | .003                              | -.042, .047  | .02      | .902     | .016                              | -.036, .068 | .37      | .542     |
| Prospective measure (UAS)     | -.025                             | -.075, .025  | .97      | .324     | -.034                             | -.100, .032 | 1.04     | .308     |
| <b>Openness</b>               |                                   |              |          |          |                                   |             |          |          |
| Age 60                        | -.046                             | -.124, .034  | 1.26     | .261     | -.053                             | -.138, .032 | 1.49     | .222     |
| Personality Measure (BFI)     | -.054                             | -.131, .023  | 1.89     | .169     | -.062                             | -.144, .021 | 2.15     | .143     |
| Personality Measure (MIDI)    | .032                              | -.077, .141  | .33      | .563     | .039                              | -.081, .157 | .41      | .524     |
| Verbal Measure (Analogies)    | -.040                             | -.113, .033  | 1.13     | .287     | -.066                             | -.141, .010 | 2.86     | .091     |
| Verbal Measure (Similarities) | .088                              | .051, .125   | 21.69    | .000     | .094                              | .063, .125  | 34.47    | .000     |
| Prospective measure (UAS)     | -.064                             | -.162, .036  | 1.58     | .209     | -.070                             | -.177, .039 | 1.60     | .206     |
| <b>Agreeableness</b>          |                                   |              |          |          |                                   |             |          |          |
| Age 60                        | .029                              | -.040, .098  | .68      | .409     | .014                              | -.052, .080 | .17      | .678     |
| Personality Measure (BFI)     | .003                              | -.071, .077  | .00      | .945     | -.012                             | -.080, .057 | .11      | .738     |

|                               |       |             |      |      |       |             |      |      |
|-------------------------------|-------|-------------|------|------|-------|-------------|------|------|
| Personality Measure (MIDI)    | -.045 | -.128, .038 | 1.13 | .288 | -.033 | -.112, .046 | .66  | .417 |
| Verbal Measure (Analogies)    | -.012 | -.079, .055 | .12  | .726 | -.002 | -.069, .065 | .00  | .958 |
| Verbal Measure (Similarities) | -.004 | -.078, .069 | .01  | .905 | -.003 | -.066, .061 | .01  | .938 |
| Prospective Measure (UAS)     | -.025 | -.115, .065 | .30  | .587 | -.038 | -.116, .041 | .89  | .346 |
| Conscientiousness             |       |             |      |      |       |             |      |      |
| Age 60                        | .018  | -.053, .089 | .25  | .615 | .012  | -.055, .079 | .13  | .720 |
| Personality Measure (BFI)     | .051  | -.007, .110 | 2.94 | .086 | .046  | -.010, .102 | 2.58 | .108 |
| Personality Measure (MIDI)    | -.052 | -.129, .025 | 1.78 | .182 | -.048 | -.120, .025 | 1.66 | .198 |
| Verbal Measure (Analogies)    | -.004 | -.072, .063 | .02  | .899 | .011  | -.056, .078 | .11  | .743 |
| Verbal Measure (Similarities) | -.049 | -.106, .009 | 2.74 | .098 | -.052 | -.098, .005 | 4.74 | .030 |
| Prospective Measure (UAS)     | -.027 | -.116, .062 | .35  | .555 | -.032 | -.114, .050 | .58  | .448 |

*Note.* Total *N* for the meta-analysis=39,177/39,169 (analogies/similarities). CI=Confidence Interval. Age 60 compared samples with a mean age below 60 (*k*=2) to a mean age above 60 (*k*=5). Personality Measure BFI compared samples with the BFI (*k*=5) to samples that used other personality measures (MIDI, TIPI) (*k*=2). Personality Measure MIDI compared samples with the MIDI (*k*=1) to samples that used other personality measures (BFI, TIPI; *k*=6). Verbal Measure Analogies compared samples with the analogies (*k*=3) to samples that used other verbal reasoning measures (similarities, sentence completion; *k*=4). Verbal Measure Similarities compared samples with the similarities (*k*=3) to samples that used other verbal reasoning measures (analogies, sentence completion; *k*=4). Prospective Measure compares samples that measured personality two years prior to the numeric reasoning measure (*k*=1) compared to samples that measured personality and numeric reasoning cross-sectionally (*k*=6).

## Supplementary Table S2

*Sample-Level Moderators of the Meta-Analytic Associations for Numeric Reasoning*

|                          | Difference<br>in Partial <i>r</i> | 95% CI      | <i>Q</i> | <i>p</i> |
|--------------------------|-----------------------------------|-------------|----------|----------|
| <b>Neuroticism</b>       |                                   |             |          |          |
| Age 60                   | .025                              | -.023, .073 | 1.03     | .311     |
| Personality Measure      | -.026                             | -.071, .020 | 1.24     | .266     |
| Prospective Measure      | .041                              | -.005, .087 | 3.01     | .083     |
| Scoring                  | -.029                             | -.079, .022 | 1.26     | .262     |
| <b>Extraversion</b>      |                                   |             |          |          |
| Age 60                   | -.011                             | -.061, .039 | .19      | .664     |
| Personality Measure      | .007                              | -.043, .056 | .07      | .794     |
| Prospective Measure      | -.026                             | -.075, .023 | 1.08     | .298     |
| Scoring                  | .007                              | -.048, .061 | .05      | .815     |
| <b>Openness</b>          |                                   |             |          |          |
| Age 60                   | -.017                             | -.059, .025 | .61      | .434     |
| Personality Measure      | .004                              | -.039, .047 | .04      | .841     |
| Prospective Measure      | -.035                             | -.070, .000 | 3.87     | .049     |
| Scoring                  | -.018                             | -.063, .027 | .62      | .432     |
| <b>Agreeableness</b>     |                                   |             |          |          |
| Age 60                   | .007                              | -.039, .052 | .08      | .778     |
| Personality Measure      | -.012                             | -.055, .031 | .29      | .589     |
| Prospective Measure      | -.025                             | -.066, .015 | 1.48     | .223     |
| Scoring                  | .010                              | -.039, .058 | .16      | .694     |
| <b>Conscientiousness</b> |                                   |             |          |          |
| Age 60                   | -.012                             | -.046, .022 | .48      | .491     |
| Personality Measure      | .030                              | .006, .054  | 6.06     | .014     |
| Prospective Measure      | -.011                             | -.050, .029 | .27      | .604     |
| Scoring                  | .019                              | -.021, .058 | .86      | .355     |

*Note.* Total *N* for the meta-analysis=76,388. CI=Confidence Interval. Age 60 compared samples with a mean age below 60 (*k*=4) to a mean age above 60 (*k*=3). Personality Measure compared samples with the BFI (*k*=4) to samples that used the MIDI (*k*=3). Prospective Measure compares samples that measured personality two years prior to the numeric reasoning measure (*k*=2) compared to samples that measured personality and numeric reasoning cross-sectionally (*k*=5). Scoring compares samples that used IRT-based scoring (*k*=5) compared to samples that used raw scoring (*k*=2).

## Supplementary Table S3

*Interactions Between Personality and Demographic Factors on Verbal Reasoning*

|                         | HRS    | UAS    | CogUSA<br>(Analogies) | CogUSA<br>(Similarities) | CFAS   | WLSG <sup>a</sup> | WLSS  | PSID |
|-------------------------|--------|--------|-----------------------|--------------------------|--------|-------------------|-------|------|
| <b>Sex interactions</b> |        |        |                       |                          |        |                   |       |      |
| Neuroticism             | -.021* | .024*  | -.012                 | .008                     | -.002  | -.012             | -.021 | -.00 |
| Extraversion            | -.004  | .001   | -.025                 | .013                     | .032   | .019              | .032  | .023 |
| Openness                | -.013  | -.005  | -.024                 | -.029                    | .058** | .013              | -.005 | .01  |
| Agreeableness           | -.006  | .005   | .019                  | .003                     | -.004  | .021              | .002  | .01  |
| Conscientiousness       | .006   | .006   | -.001                 | .031                     | .032   | .025*             | .041* | .00  |
| <b>Age interactions</b> |        |        |                       |                          |        |                   |       |      |
| Neuroticism             | -.006  | .016   | .023                  | .020                     | .008   | --                | -.008 | -.02 |
| Extraversion            | .018*  | -.012  | -.005                 | .006                     | .000   | --                | .007  | .025 |
| Openness                | -.008  | -.016  | -.033                 | .006                     | .000   | --                | .030  | -.01 |
| Agreeableness           | .009   | -.026* | .008                  | -.033                    | -.006  | --                | .029  | -.00 |
| Conscientiousness       | .008   | -.021  | .050                  | -.027                    | .034   | --                | .020  | .01  |

*Note.*  $N=13,398$  for HRS;  $N=5,800$  for UAS;  $N=1,212/1,207$  for CogUSA Analogies and Similarities, respectively;  $N=2,092$  for CFAS;  $N=5,924$  for WLSG;  $N=3,120$  for WLSS;  $N=7,631$  for PSID. Regression coefficients are interaction term for each trait with the demographic moderator on verbal reasoning controlling for the main effect of the trait and demographic factor. HRS=Health and Retirement Study. UAS=Understanding America Study. CogUSA=Cognition in the United States. CFAS=Cognitive Function and Ageing Study in Wales. WLSG=Wisconsin Longitudinal Study Graduate sample. WLSS= Wisconsin Longitudinal Study Sibling sample. PSID= Panel Study of Income Dynamics. <sup>a</sup> Interaction with age was not computed because participants in the sample were nearly all the same age.

\*  $p<.05$ . \*\* $p<.01$ .

## Supplementary Table S4

*Interactions Between Personality and Demographic Factors on Numeric Reasoning*

|                         | HRS   | UAS   | CogUSA | MIDUS | US      | PSID  | ELSA   |
|-------------------------|-------|-------|--------|-------|---------|-------|--------|
| <b>Sex interactions</b> |       |       |        |       |         |       |        |
| Neuroticism             | .000  | .027* | .001   | -.011 | .000    | .006  | .011   |
| Extraversion            | .002  | .016  | -.005  | .011  | .015**  | .015  | .010   |
| Openness                | -.010 | -.005 | -.028  | .005  | -.014** | .005  | -.009  |
| Agreeableness           | .001  | .011  | .025   | -.015 | .000    | .001  | .008   |
| Conscientiousness       | -.009 | -.005 | .010   | .024  | .014**  | -.002 | -.002  |
| <b>Age interactions</b> |       |       |        |       |         |       |        |
| Neuroticism             | -.013 | .004  | .005   | .029* | .007    | -.019 | .030** |
| Extraversion            | .004  | -.012 | .011   | .008  | -.006   | .018  | .012   |
| Openness                | .014  | -.016 | .013   | .008  | .000    | .012  | .021   |
| Agreeableness           | .008  | -.006 | .037   | .013  | -.030** | -.002 | .026*  |
| Conscientiousness       | .010  | -.002 | .036   | .006  | -.015** | -.007 | .013   |

*Note.*  $N=12,476$  for HRS;  $N=6,025$  for UAS;  $N=1,207$  CogUSA;  $N=3,622$  for MIDUS;  $N=38,315$  for US;  $N=7,631$  for PSID;  $N=7,112$  for ELSA. Regression coefficients are interaction term for each trait with the demographic moderator on numeric reasoning controlling for the main effect of the trait and demographic factor. HRS=Health and Retirement Study. UAS=Understanding America Study. CogUSA=Cognition in the United States. MIDUS=Midlife in the United States. US=Understanding Society. PSID= Panel Study of Income Dynamics. ELSA=English Longitudinal Study of Ageing.

\*  $p < .05$ . \*\* $p < .01$ .
